# Supplementary material
Source: Springer Nature journal article supplement (https://www.springermedizin.de/resource/supplementary/12885_2007_981_MOESM5_ESM.pdf/9471822)
Supplement: MOESM5 [file 9471822]

**Additional Table 5 Comparisons of non-neoplastic ducts**

| Protein                           | mean level (Dt) | mean level (D) | p-value      |
|-----------------------------------|-----------------|----------------|--------------|
| ADAM9                             | 1.692           | 1.417          | 0.150        |
| <b>PKB<math>\beta</math>-C</b>    | <b>1.154</b>    | <b>0.667</b>   | <b>0.028</b> |
| PKB $\beta$ -N                    | 0.083           | 0.000          | 0.164        |
| p-PKB (S473)-C                    | 0.846           | 0.917          | 0.303        |
| p-PKB (S473)-N                    | 1.154           | 1.083          | 0.349        |
| p-PKB (T308)-C                    | 1.182           | 1.000          | 0.154        |
| p-PKB (T308)-N                    | 1.727           | 1.750          | 0.466        |
| p- $\beta$ CAT-C                  | 2.385           | 2.667          | 0.167        |
| p $\beta$ CAT-N                   | 1.385           | 1.167          | 0.163        |
| $\beta$ CAT -C                    | 1.000           | 0.917          | 0.282        |
| $\beta$ CAT-N                     | 0.000           | 0.000          | —            |
| <b>EGFR</b>                       | <b>1.538</b>    | <b>0.917</b>   | <b>0.055</b> |
| p-GSK3 $\beta$ -C                 | 2.154           | 2.000          | 0.298        |
| <b>p-GSK3<math>\beta</math>-N</b> | <b>0.385</b>    | <b>0.000</b>   | <b>0.008</b> |
| MET                               | 0.000           | 0.000          | —            |
| p-mTOR                            | 1.846           | 1.667          | 0.157        |
| p-NF $\kappa$ B-C                 | 1.000           | 0.750          | 0.089        |
| p-NF $\kappa$ B-N                 | 2.583           | 2.083          | 0.116        |
| p-JNK-C                           | 0.333           | 0.333          | 0.500        |
| p-JNK-N                           | 1.583           | 1.583          | 0.500        |
| p-ERK-C                           | 1.000           | 0.750          | 0.122        |
| <b>p-ERK-N</b>                    | <b>2.000</b>    | <b>1.500</b>   | <b>0.042</b> |
| p-p38-C                           | 1.083           | 1.250          | 0.204        |
| <b>p-p38-N</b>                    | <b>2.333</b>    | <b>1.917</b>   | <b>0.028</b> |
| <b>p-S6-C</b>                     | <b>1.231</b>    | <b>1.667</b>   | <b>0.030</b> |
| PTEN-C                            | 1.000           | 1.083          | 0.383        |
| PTEN-N                            | 0.538           | 0.833          | 0.062        |
| p-RAF-C                           | 2.077           | 1.500          | 0.058        |
| p-S6K-C                           | 1.083           | 0.667          | 0.092        |
| SMAD4-C                           | 1.308           | 0.909          | 0.098        |
| SMAD4-N                           | 2.000           | 2.000          | 0.500        |
| SRC-C                             | 0.462           | 0.167          | 0.096        |
| p-SRC-C                           | 1.385           | 1.000          | 0.108        |
| p-STAT (S727)-C                   | 1.308           | 0.917          | 0.092        |
| p-STAT (S727)-N                   | 2.077           | 1.917          | 0.305        |
| p-STAT (Y705)-C                   | 1.385           | 1.333          | 0.400        |
| p-STAT (Y705)-N                   | 1.692           | 1.500          | 0.208        |

Mean protein levels of non-neoplastic duct epithelia in peritumoral regions (Dt) are compared to ducts from non-cancerous pancreas specimens (D) using Student's t-test. Protein levels are scored in the cytoplasmic (-C) and nuclear (-N) cellular compartments.
